# Supplementary material for: Synthesis and characterization of biodegradable lysine-based waterborne polyurethane for soft tissue engineering applications
Source: Royal Society of Chemistry journal article supplement (doi:10.1039/c6bm00588h), 2016-01-01
Supplement: c6bm00588h2.pdf [file c6bm00588h2.pdf]

## **Supporting information**

### **Synthesis and characterization of biodegradable lysine-based waterborne polyurethane for soft tissue engineering applications**

Hongye Hao, Jingyu Shao, Ya Deng, Shan He, Feng Luo, Yingke Wu, Jiehua Li, \*  
Hong Tan, \* Jianshu Li and Qiang Fu

College of Polymer Science and Engineering, State Key Laboratory of Polymer  
Materials Engineering, Sichuan University, Chengdu 610065, China

#### **Characterize**

##### **1. Fourier transform infrared spectroscopy**

Attenuated total reflectance Fourier transform infrared spectroscopy (ATR-FTIR) infrared data were obtained from a Nicolet-560 spectrophotometer (Thermo Electron Corporation, Nicolet, America) between 4000 and 6000  $\text{cm}^{-1}$  equipped with a Geprism with an incident angle of  $45^\circ$ . Fifty scans were averaged for each sample.

##### **2. Differential scanning calorimetry (DSC)**

To characterize the thermal behavior of LWPU, The DSC analysis was performed with a differential scanning calorimeter (TA instrument 2910 thermal analyzer, America) to measure the heat variation at a heating rate of  $10^\circ\text{C}/\text{min}$ . The measuring range of this analysis was set between  $-150$  and  $150^\circ\text{C}$ .

## Results and Discussion

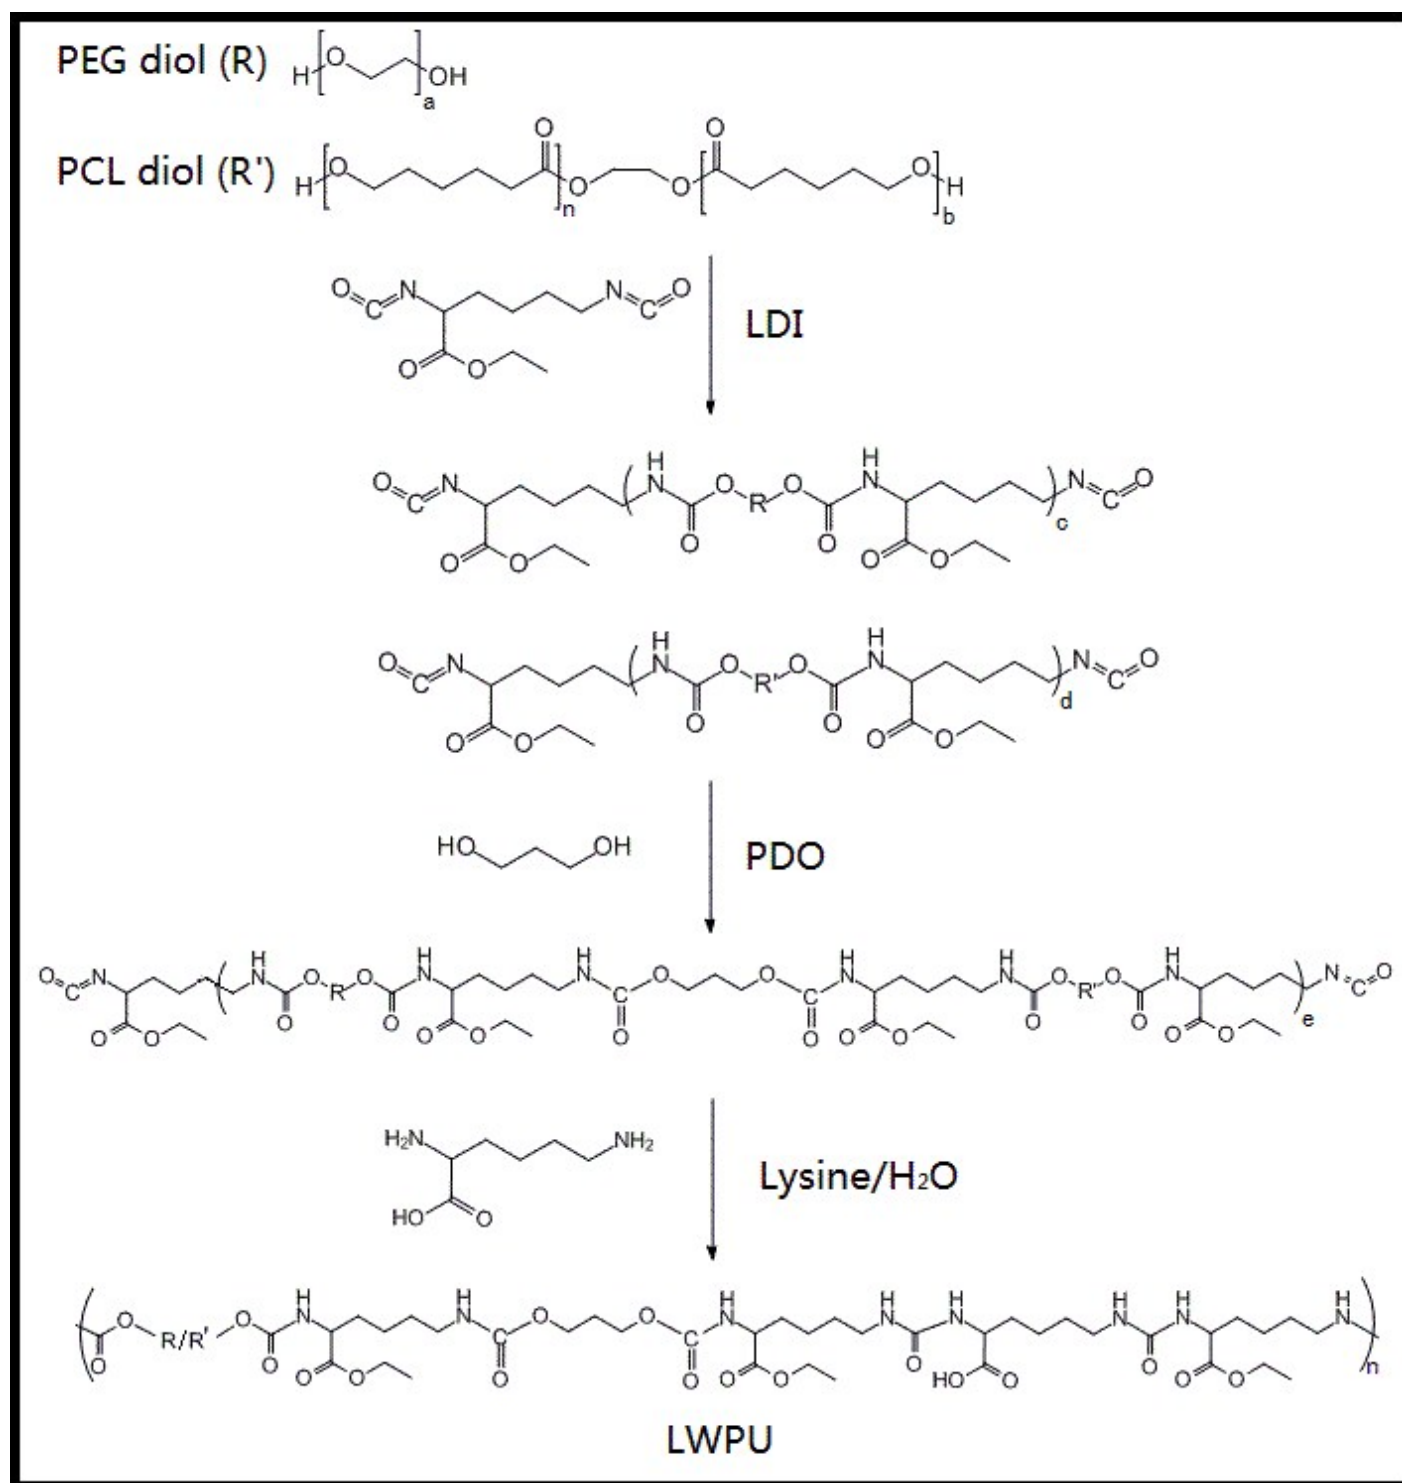

Figure S1. The chemical structure and synthetic procedure of LWPU.

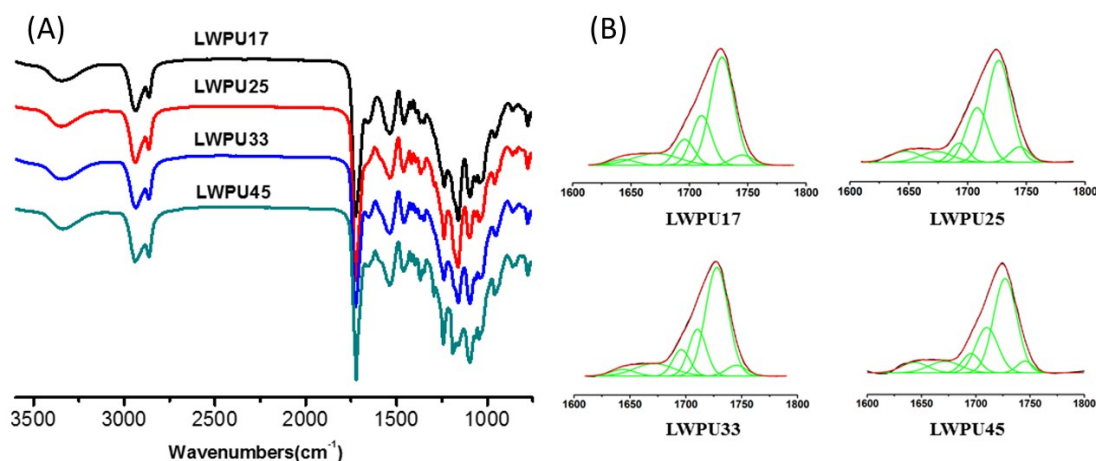

Figure S2. (A) ATR-FTIR spectra curves of LWPUs; (B) A split of carbonyl region between 1600 and 1850  $\text{cm}^{-1}$  of LWPUs.

The ATR-FTIR spectra of LWPUs shows that free (not hydrogen-bonded) N–H stretching absorption bands at  $3450\text{ cm}^{-1}$  are weak in Figure S2A, demonstrating that most of N–H formed hydrogen bond with C=O groups<sup>1</sup>. And the carbonyl groups in urethane and urea at stretching band from  $1850\text{--}1600\text{ cm}^{-1}$  are mainly overlapped by the stretching band of carbonyl in urethane, urea, ester carboxyl groups of PCL and LDI<sup>2</sup>. In this region, the stretching bands of LWPUs are mainly comprised of the free carbonyl of hard segments at  $1730\text{ cm}^{-1}$ ,  $1700\text{ cm}^{-1}$ ,  $1676\text{ cm}^{-1}$  due to the absorption of the free carbonyl of PCL, urethane linkage and urea groups, respectively. The hydrogen-bonded carbonyl absorption between hard segments and soft segments is at  $1720\text{ cm}^{-1}$ <sup>3</sup>, while the hydrogen-bonded carbonyl absorption among hard segments is at  $1690\text{ cm}^{-1}$  for the carbonyl absorption of urethane linkage and  $1645\text{ cm}^{-1}$  for urea groups. Herein, the carbonyl adsorption regions were fit to subpeaks of relevant

groups for investigation of the microphase separation degree of LWPU s (Figure S2B).

The percentages of hydrogen bonded carbonyl in urethane and urea groups to total carbonyl groups are listed in Table S1. These percentage of hydrogen bonded carbonyl in LWPU45 (14.2%) is higher than those of LWPU17 (12.8%), LWPU25 (10.6%) and LWPU33 (13.1%), indicating that the microphase separation degree of LWPU45 is superior to that of other samples. These results suggest that LWPU s are successfully synthesized with various degree of microphase separation.

Table S1. Absorption band assignments between 1600 and 1850  $\text{cm}^{-1}$  and their respective integration areas of LWPU s.

| Frequency<br>( $\text{Cm}^{-1}$ ) | Absorption band assignment                               | Integration area (%) |        |        |        |
|-----------------------------------|----------------------------------------------------------|----------------------|--------|--------|--------|
|                                   |                                                          | LWPU17               | LWPU25 | LWPU33 | LWPU45 |
| 1744                              | (C=O) of ethyl ester groups of LDI                       | 4.5                  | 3.0    | 4.6    | 4.2    |
| 1727                              | carbonyl(C=O) in ester group of soft segments            | 51.8                 | 49.0   | 53.9   | 49.9   |
| 1700                              | (C=O) free carbonyl in urethane linkage                  | 20.1                 | 29.5   | 17.9   | 23.2   |
| 1690                              | (C=O) hydrogen bonded carbonyl in urethane linkage       | 9.9                  | 8.2    | 9.7    | 7.8    |
| 1676                              | (C=O) free carbonyl in urea groups                       | 10.8                 | 7.9    | 10.5   | 8.4    |
| 1645                              | (C=O) hydrogen bonded carbonyl in urea groups            | 2.9                  | 2.4    | 3.4    | 6.4    |
|                                   | The percentage of hydrogen bonding between hard segments | 12.8%                | 10.6%  | 13.1%  | 14.2%  |

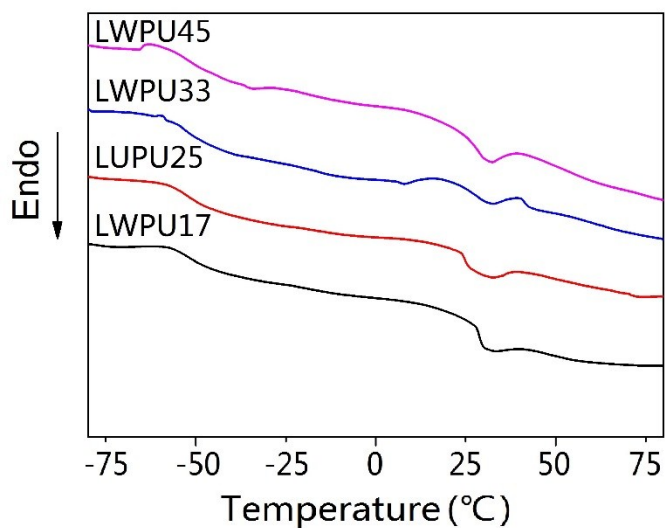

Figure S3. DSC curves of LWPU, the heating rate of 10 °C/min.

Table S2, Glass transition temperatures and enthalpies of LWPUs by DSC test.

| Sample | T <sub>g</sub> (°C) | ΔH (J/g) |
|--------|---------------------|----------|
| LWPU17 | -51.61              | 0.62     |
| LWPU25 | -52.40              | 1.05     |
| LWPU33 | -53.14              | 0.80     |
| LWPU45 | -53.22              | 0.56     |

DSC experiment was carried out to measure the thermal properties of LWPUs. The results are shown in Figure S3, and the data are summarized in Table S2. For polyurethane materials, the glass transition temperature ( $T_g$ ) of the soft segments has been used as an indicator of the degree of microphase separation<sup>4</sup>. As shown in Figure S3, no obvious thermal transition related to hard segment was observed in all

DSC curves of LWPU. And  $T_g$ s of the LWPU soft segments from -53 °C to -51 °C are higher than that of pure PCL ( $T_g = -60$  °C) , indicating that these obtained polyurethanes have a certain degree of hard and soft segment mixing. Different melting endotherm could be observed between 25 and 50 °C, which should be attributed to different degree of crystallinity and crystal size of soft segment. However, the increase of PEG content promoted the phase separation for thermodynamic incompatibility between hard and soft segment increasing<sup>5</sup>, which is in good agreement with results of ATR-FTIR analysis.

## ***References***

1. Li, G.; Li, P.; Qiu, H.; Li, D.; Su, M.; Xu, K. *J. Biomed. Mater. Res., Part A* 2011, 98a, (1), 88-99.
2. Li, J.; Tan, D.; Zhang, X.; Hong, T.; Ding, M.; Wan, C.; Qiang, F. *Colloids Surf., B* 2010, 78, (2), 343–350.
3. Zhou, L.; Yu, L.; Ding, M.; Li, J.; Tan, H.; Wang, Z.; Fu, Q. *Macromolecules* 2011, 44, (4), 857-864.
4. Furukawa, M.; Kojio, K.; Kugumiya, S.; Uchiba, Y.; Mitsui, Y. *Macromol. Symp.* 2008, 9-15.
5. Cao, J.; Cheng, F.; Cao, H.; Lu, A.; Cai, M.; Chen, Y.; He, B.; Gu, Z.; Luo, X., *Colloids Surf., B* 2015, 125c, 213–221.
